# Supplementary material for: Commercial-Scale Modification of NdFeB Magnets under Laser-Assisted Conditions
Source: MDPI journal article supplement (doi:10.3390/nano14050431), 2024-02-27
Supplement: s1 [file s1]

## Supplementary figures

### Commercial-scale modification of NdFeB magnets under laser-assisted conditions

#### I Magnetic flux density

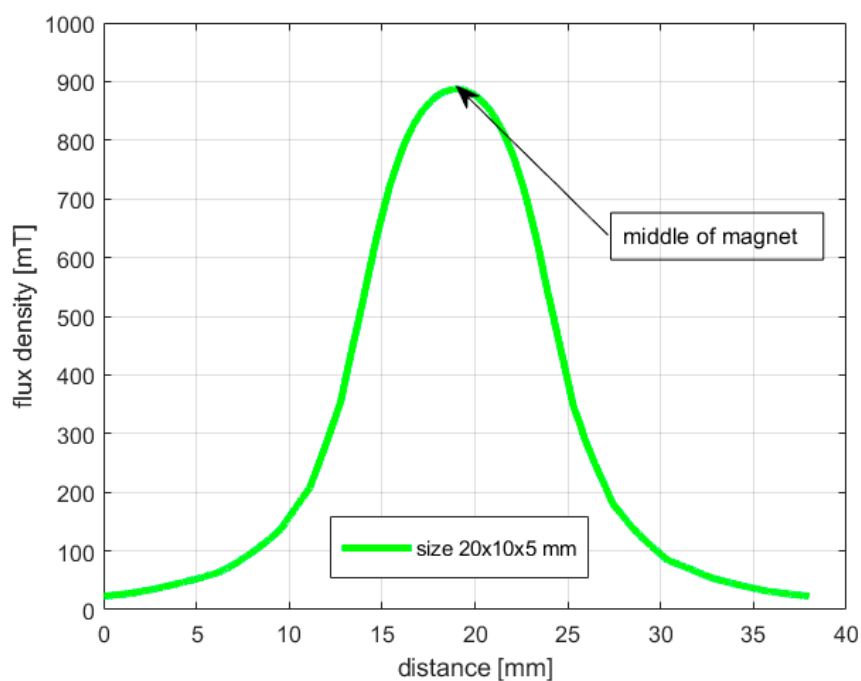

**Figure S1.** Magnetic flux density according to the distance from the magnet's middle for size of 20x10x5 mm, FEM analysis using ANSYS Maxwell software.

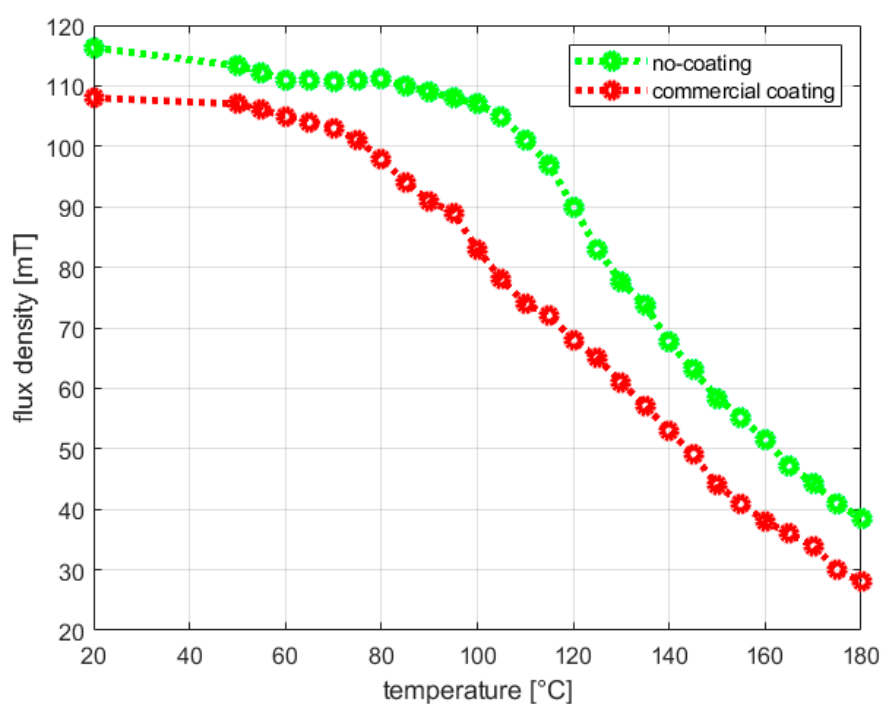

**Figure S2.** Laboratory tests of magnetic flux density as a function of temperature: green line: no-coating; red line: commercial Cu-Ni-Cu magnet coating.

## II Morphology study

- *Powders used for coatings preparation: spongy Ti, ZrO<sub>2</sub> stabilized with Y and self-made powder mixes: NiBSi/ZrO<sub>2</sub> and Nd/ZrO<sub>2</sub>*

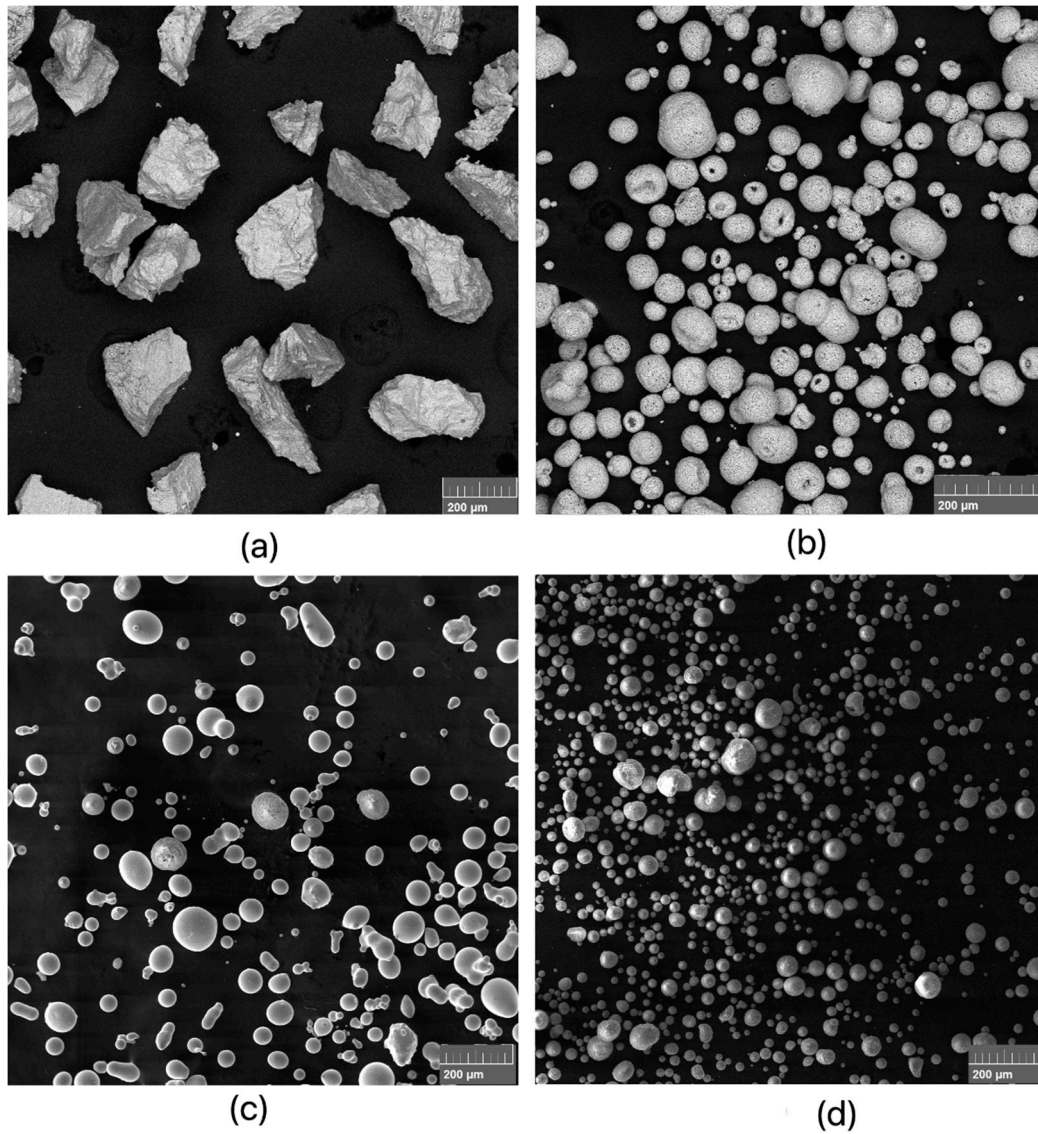

**Figure S3.** SEM images of the powders used for coatings preparation: (a) Ti; (b) ZrO<sub>2</sub> stabilized with Y; (c) NiBSi/ZrO<sub>2</sub>; (d) Nd/ZrO<sub>2</sub>.

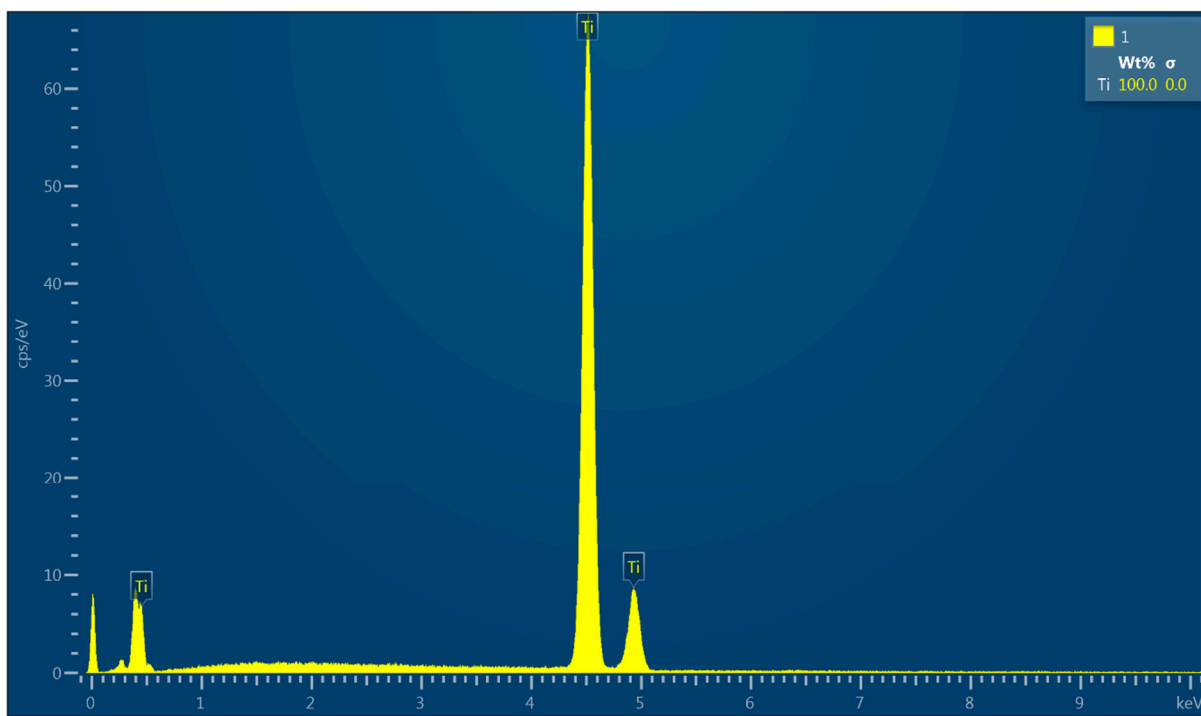

(a)

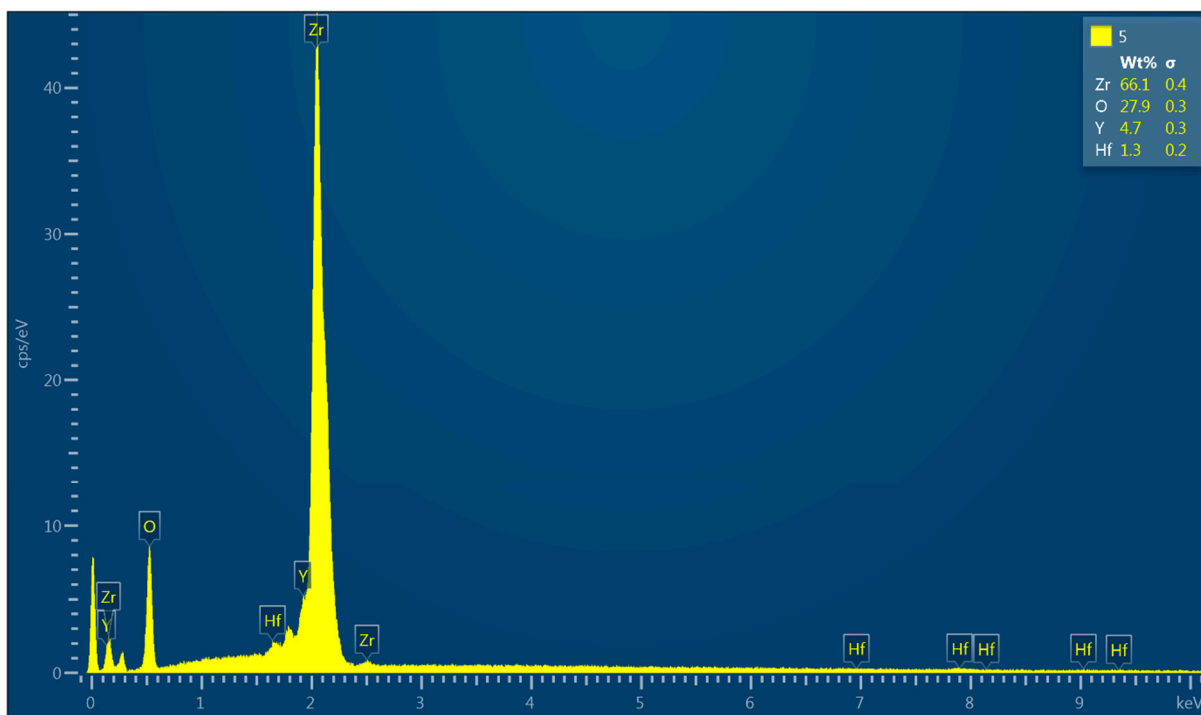

(b)

**Figure S4.** EDS analysis of the powders used for Samples 1 and 2: (a) Ti; (b) ZrO<sub>2</sub> stabilized with Y.

- *Raw NdFeB magnet*

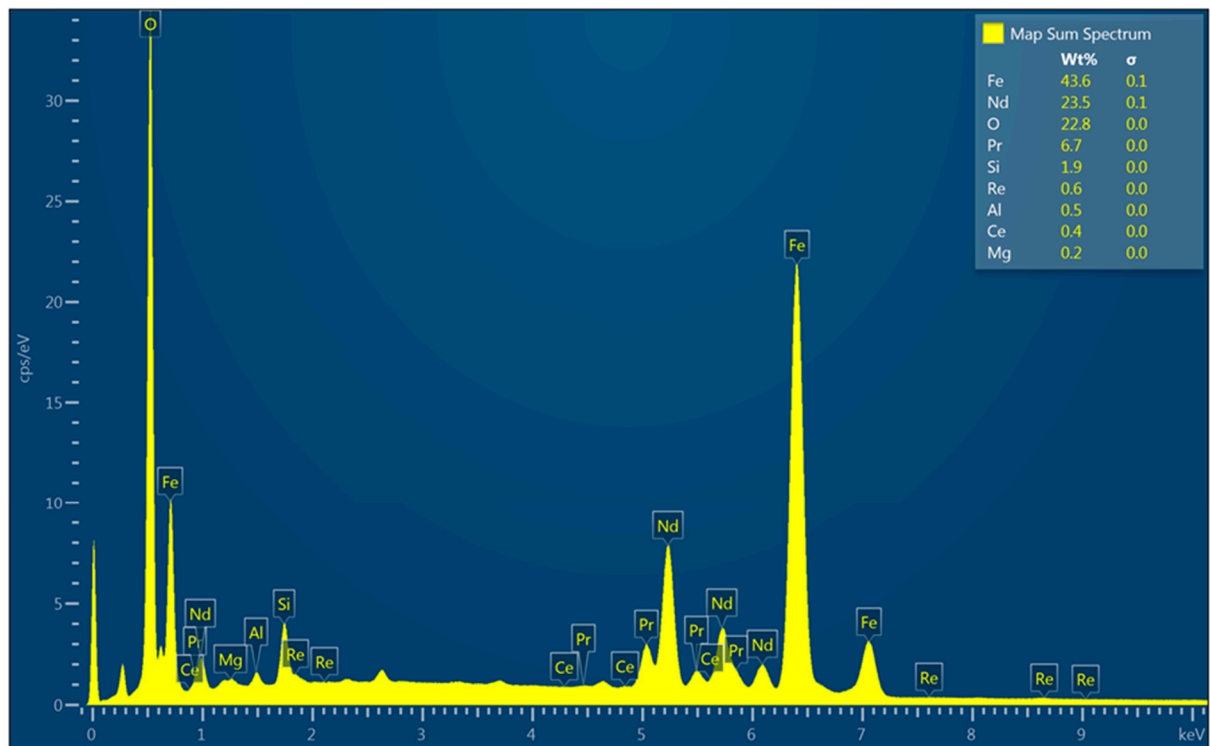

**Figure S5.** EDS analysis of the uncoated NdFeB magnet.

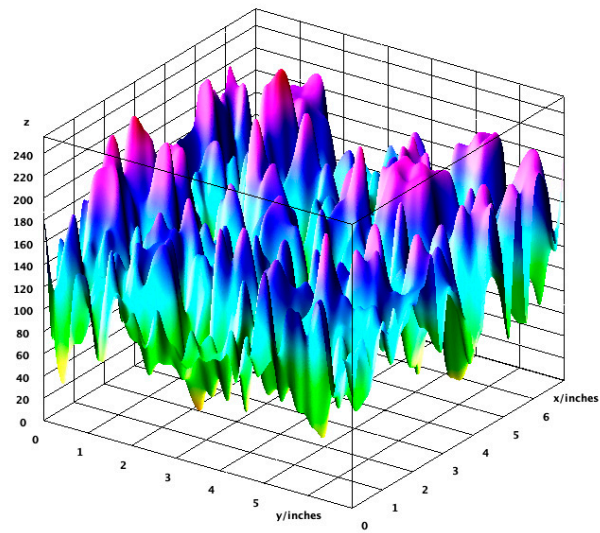

**Figure S6.** Surface roughness analysis of the uncoated NdFeB magnet.

- *Sample 1 – coating from spongy Ti, applied power of 100 W, 150 W, 175 W and 200 W.*

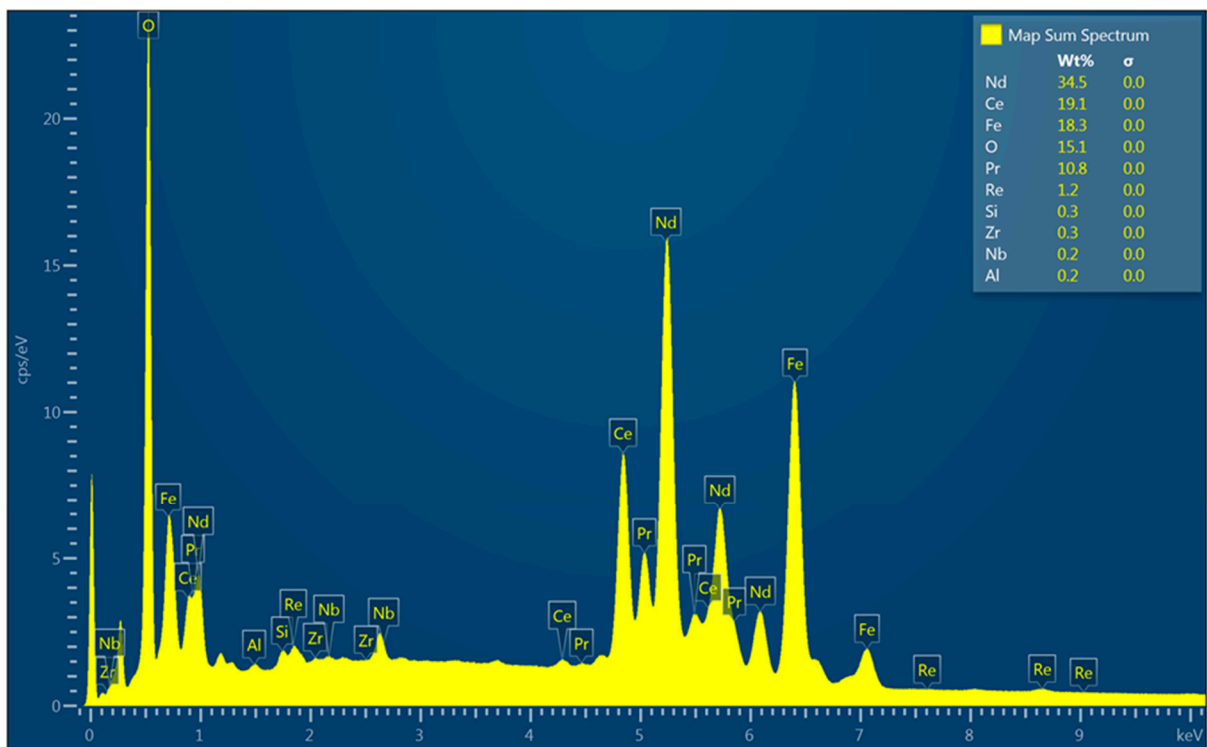

(a)

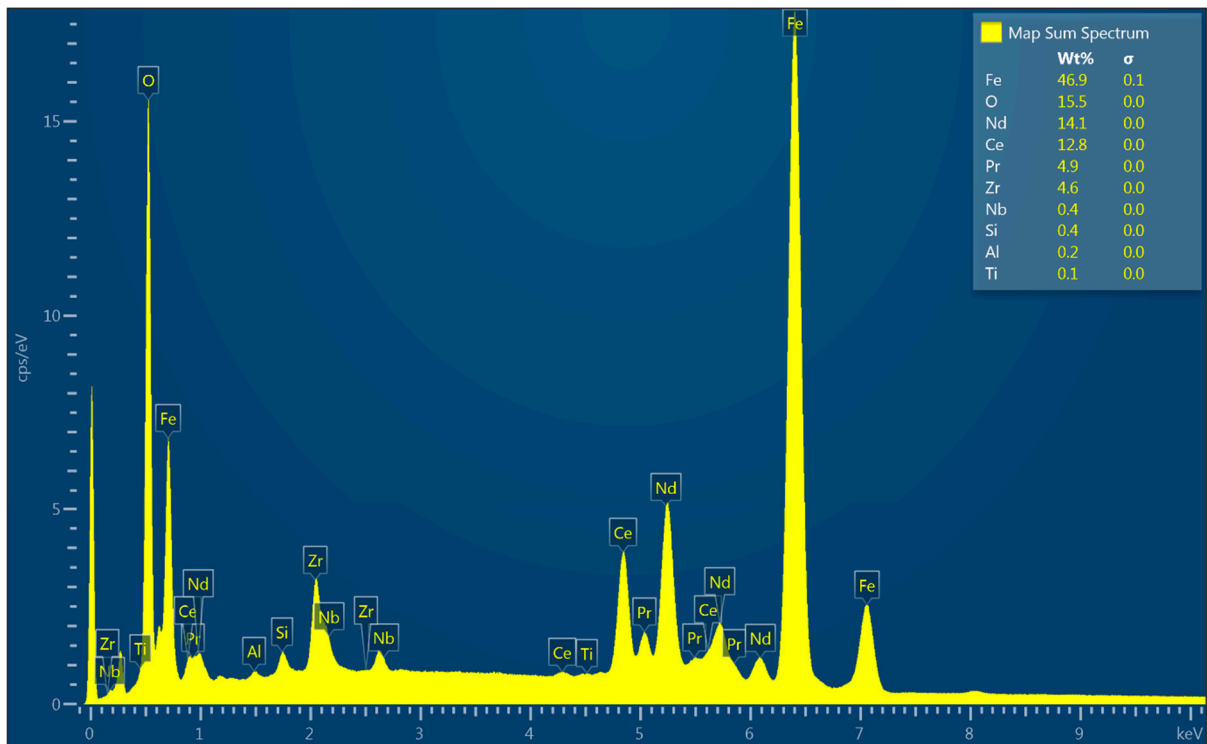

(b)

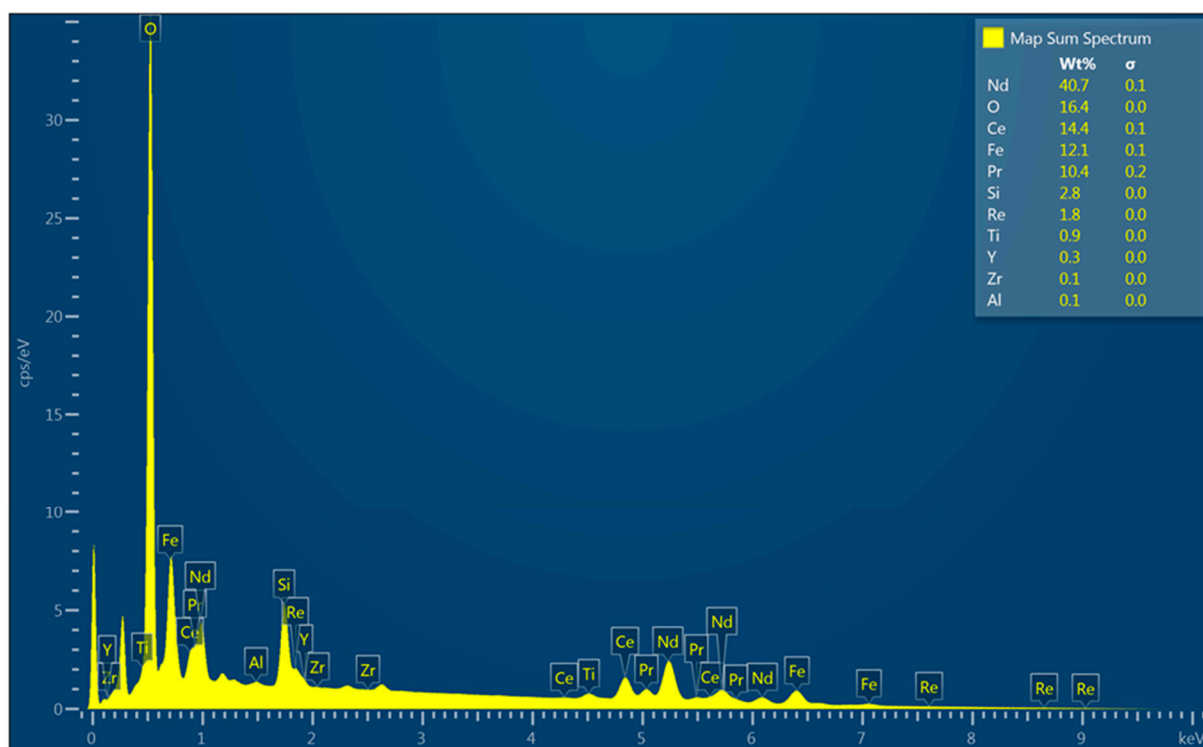

(c)

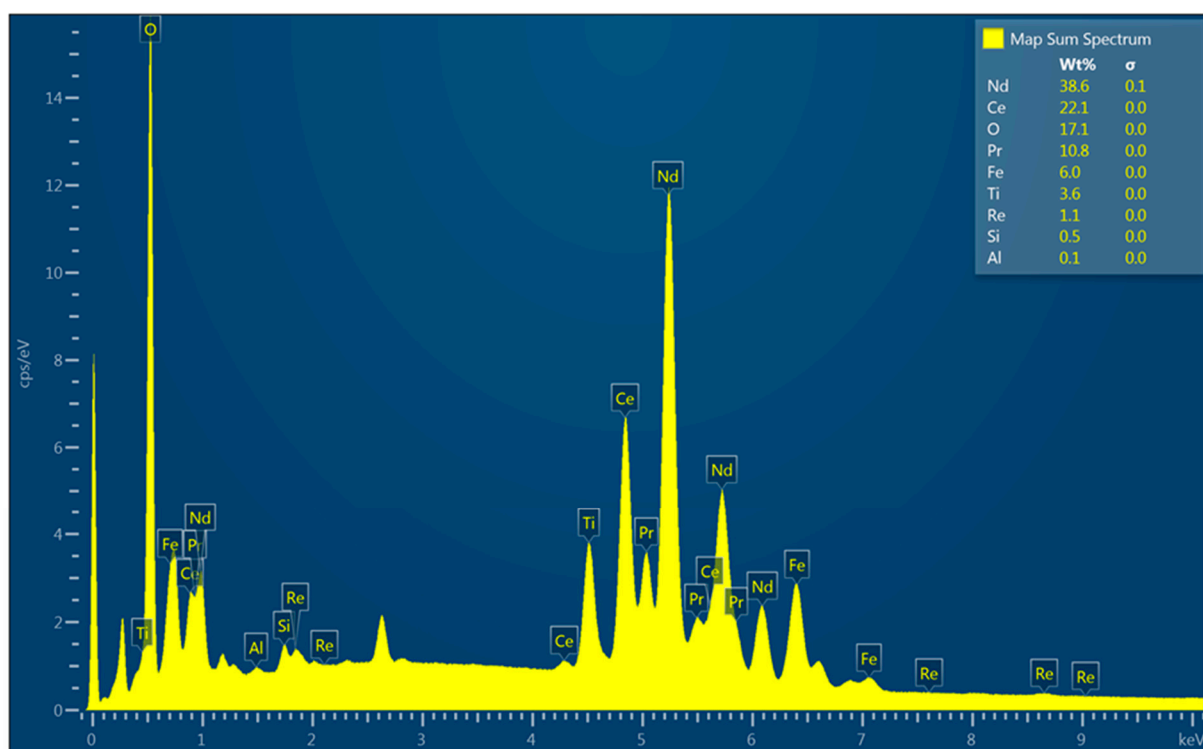

(d)

**Figure S7.** EDS analysis of Sample 1: (a) 100 W; (b) 150 W; (c) 175 W; (d) 200 W.



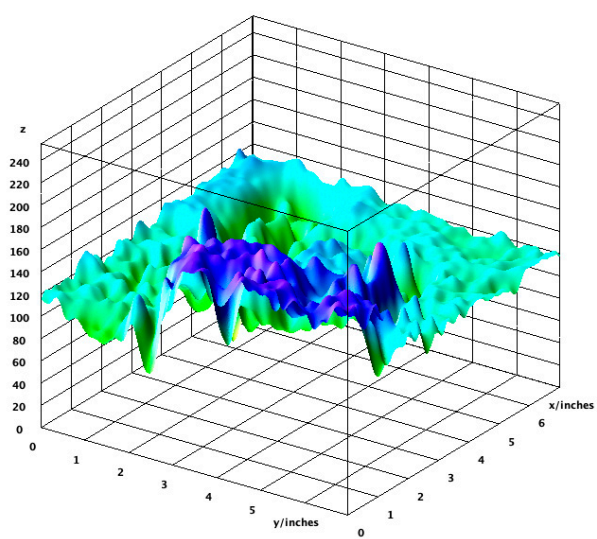

(a)

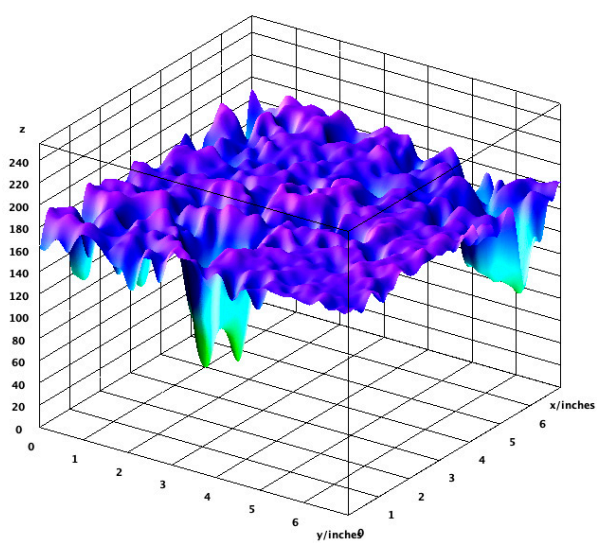

(b)

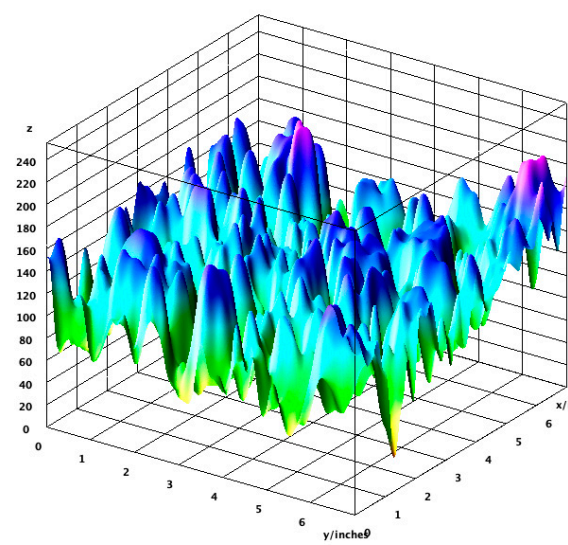

(c)

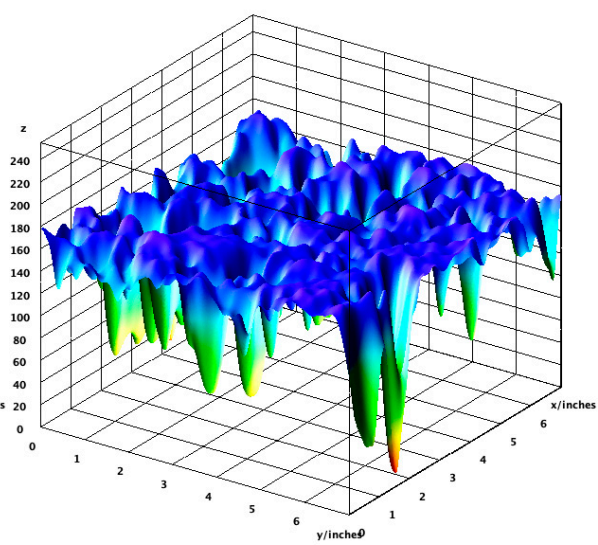

(d)

**Figure S8.** Surface roughness analysis of Sample 1: (a) 100 W; (b) 150 W; (c) 175 W; (d) 200 W.

- Sample 2 – coating from ZrO<sub>2</sub> stabilized with Y, applied power of 100 W, 150 W, 175 W and 200 W

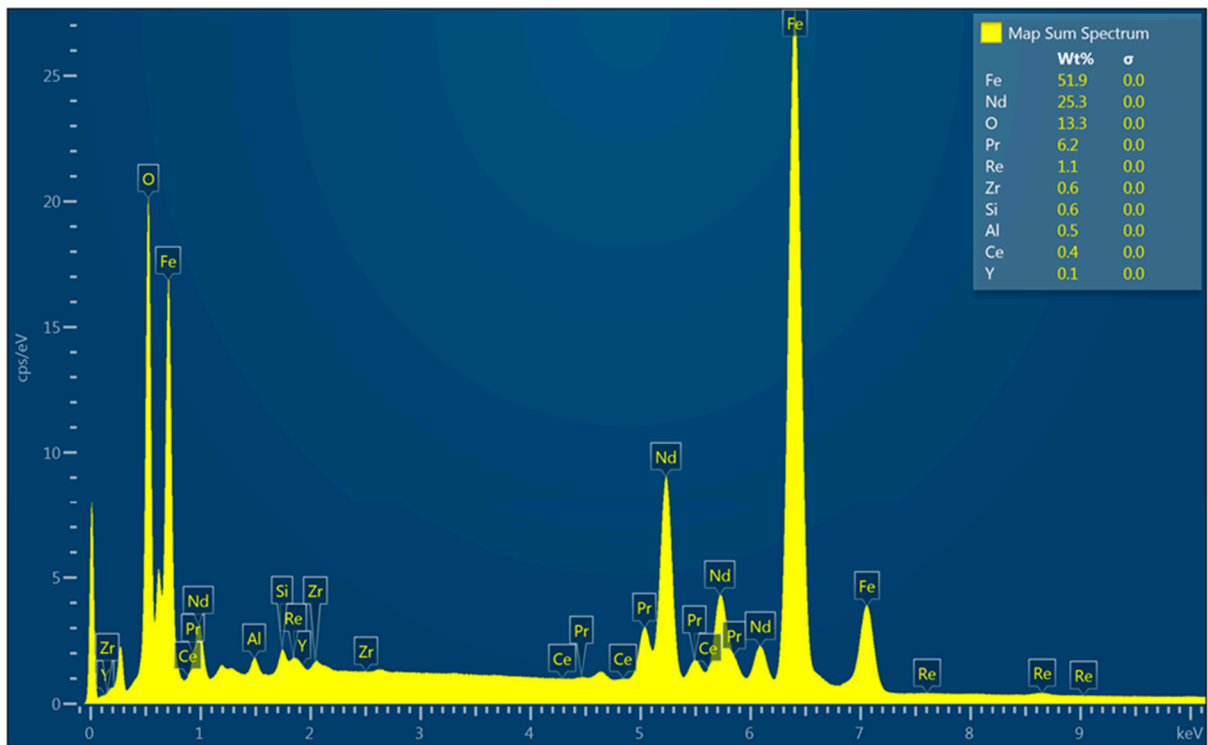

(a)

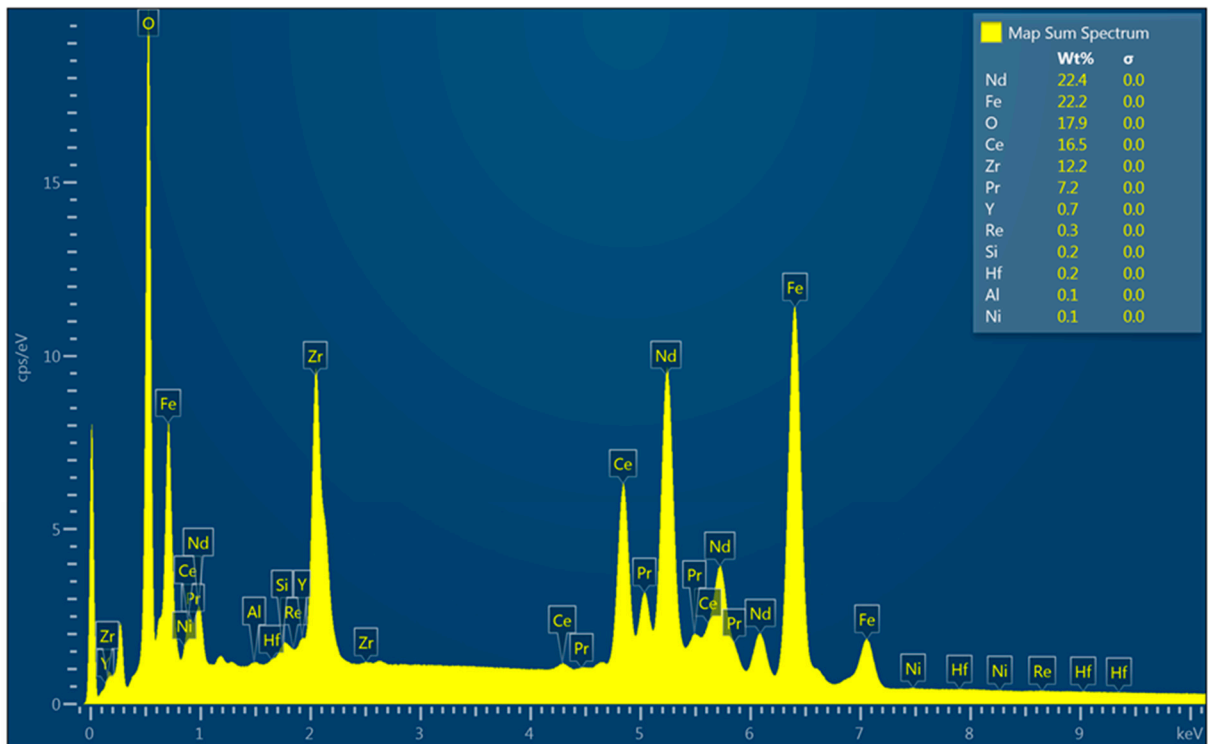

(b)



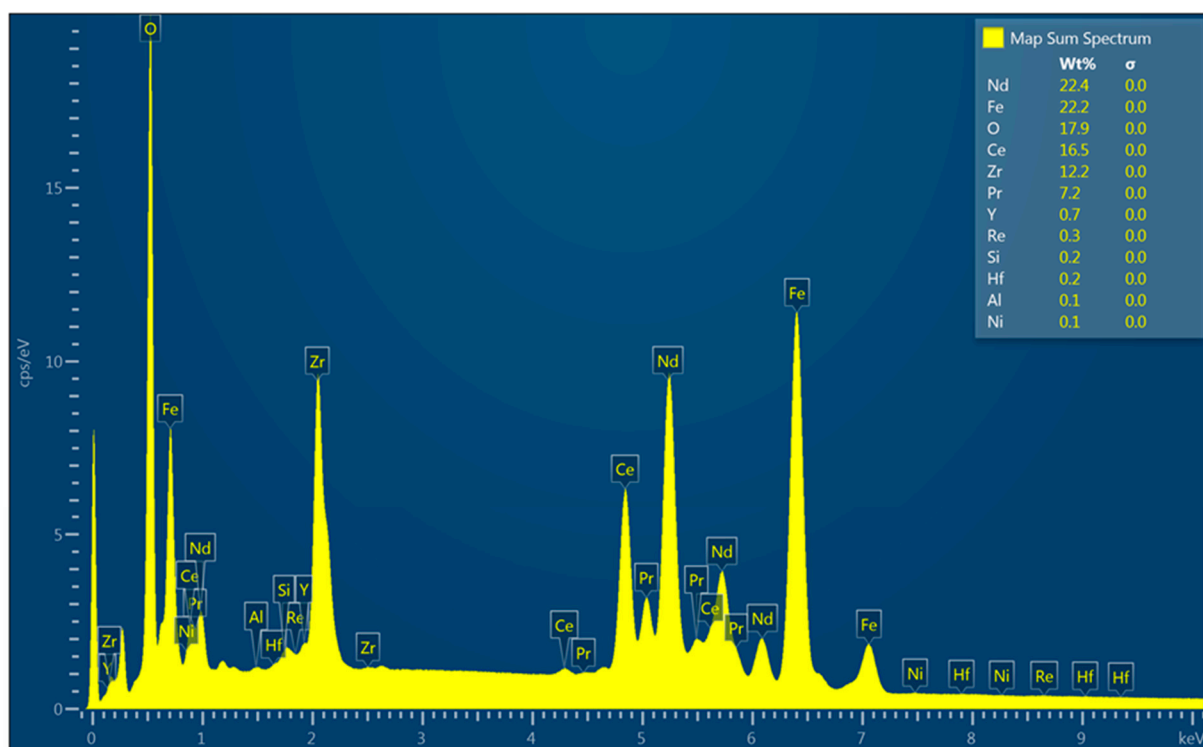

(c)

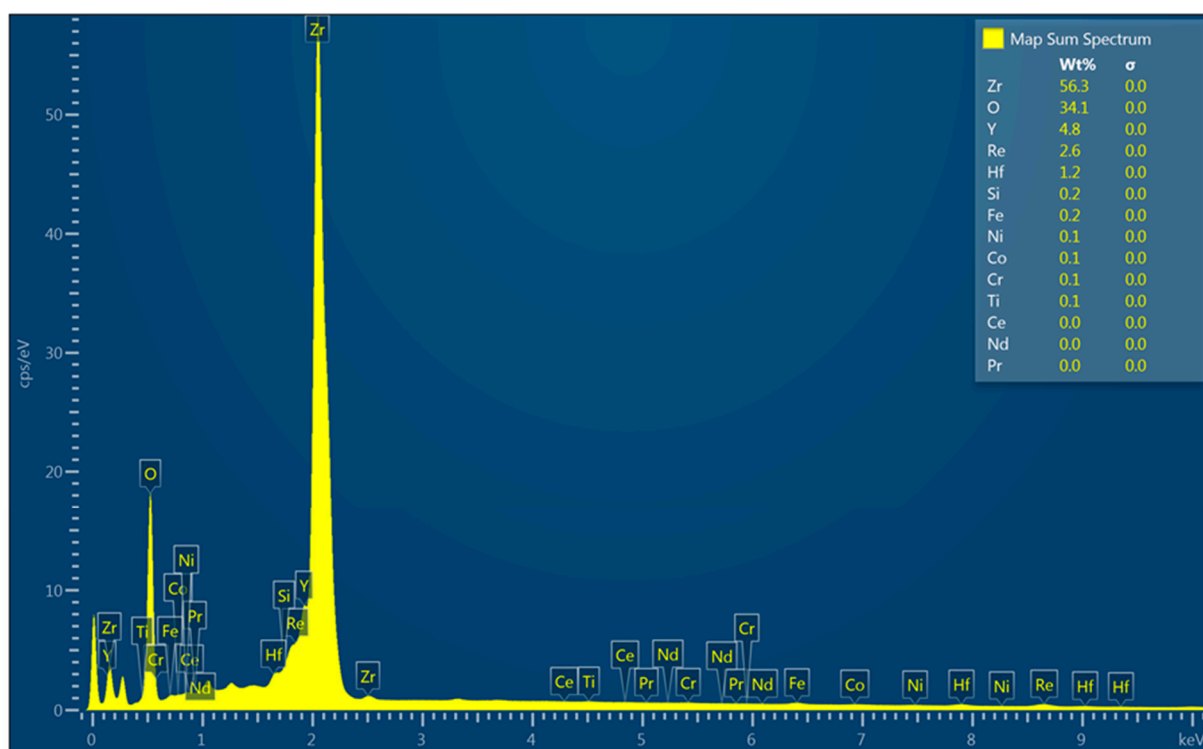

(d)

Figure S9. EDS analysis of Sample 2: (a) 100 W; (b) 150 W; (c) 175 W; (d) 200 W.

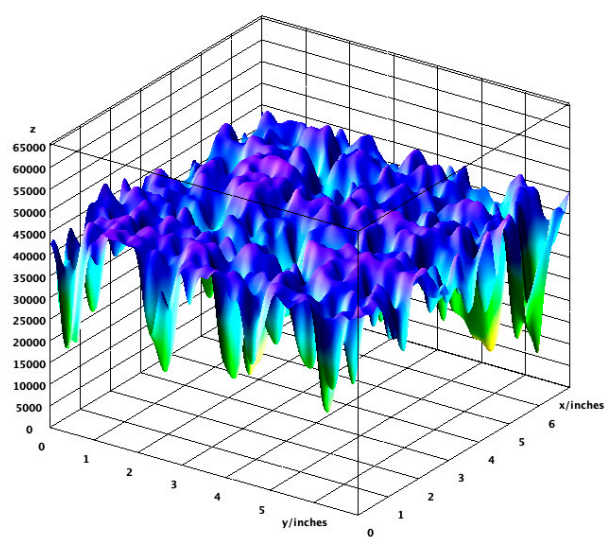

(a)

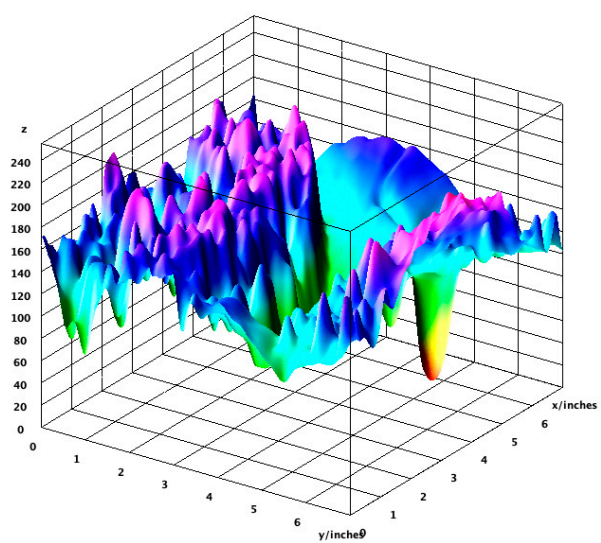

(b)

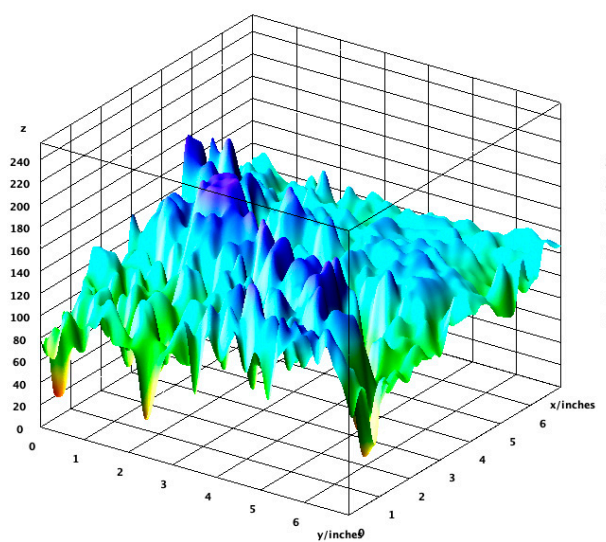

(c)

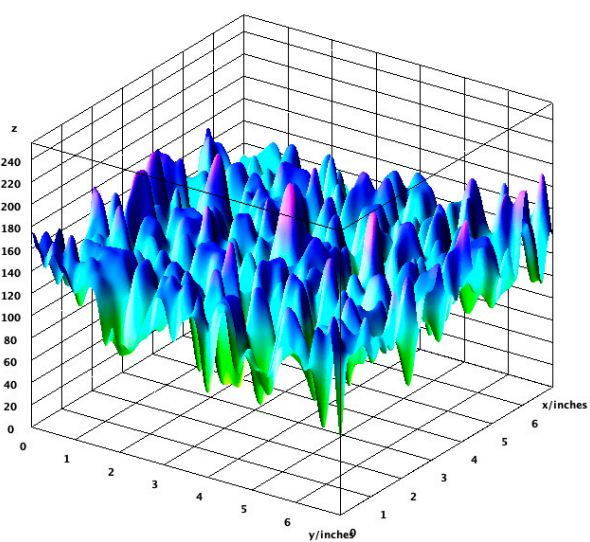

(d)

**Figure S10.** Surface roughness analysis of Sample 2: (a) 100 W; (b) 150 W; (c) 175 W; (d) 200 W.

- *Sample 3 - coating from self-made powder mix NiBSi/ZrO<sub>2</sub>, applied power of 200 W*

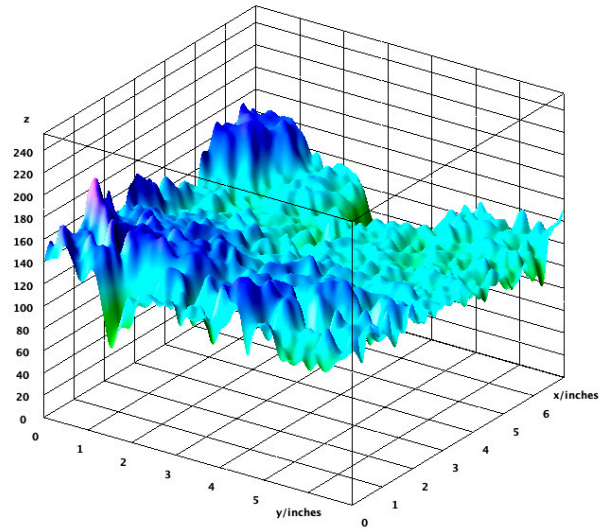

**Figure S11.** Surface roughness analysis of Sample 3

- *Sample 4 – coating from self-made powder mix Nd/ZrO<sub>2</sub>, applied power of 200 W*

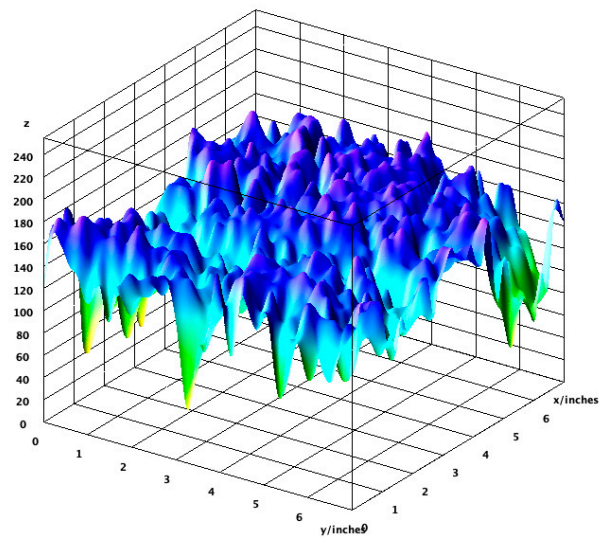

**Figure S12.** Surface roughness analysis of Sample 4.
